# Supplementary material for: Biogenic carbon dots: a novel mechanistic approach to combat multidrug-resistant critical pathogens on the global priority list
Source: Royal Society of Chemistry journal article supplement (doi:10.1039/d3tb02374e), 2023-12-11
Supplement: d3tb02374e1.pdf [file d3tb02374e1.pdf]

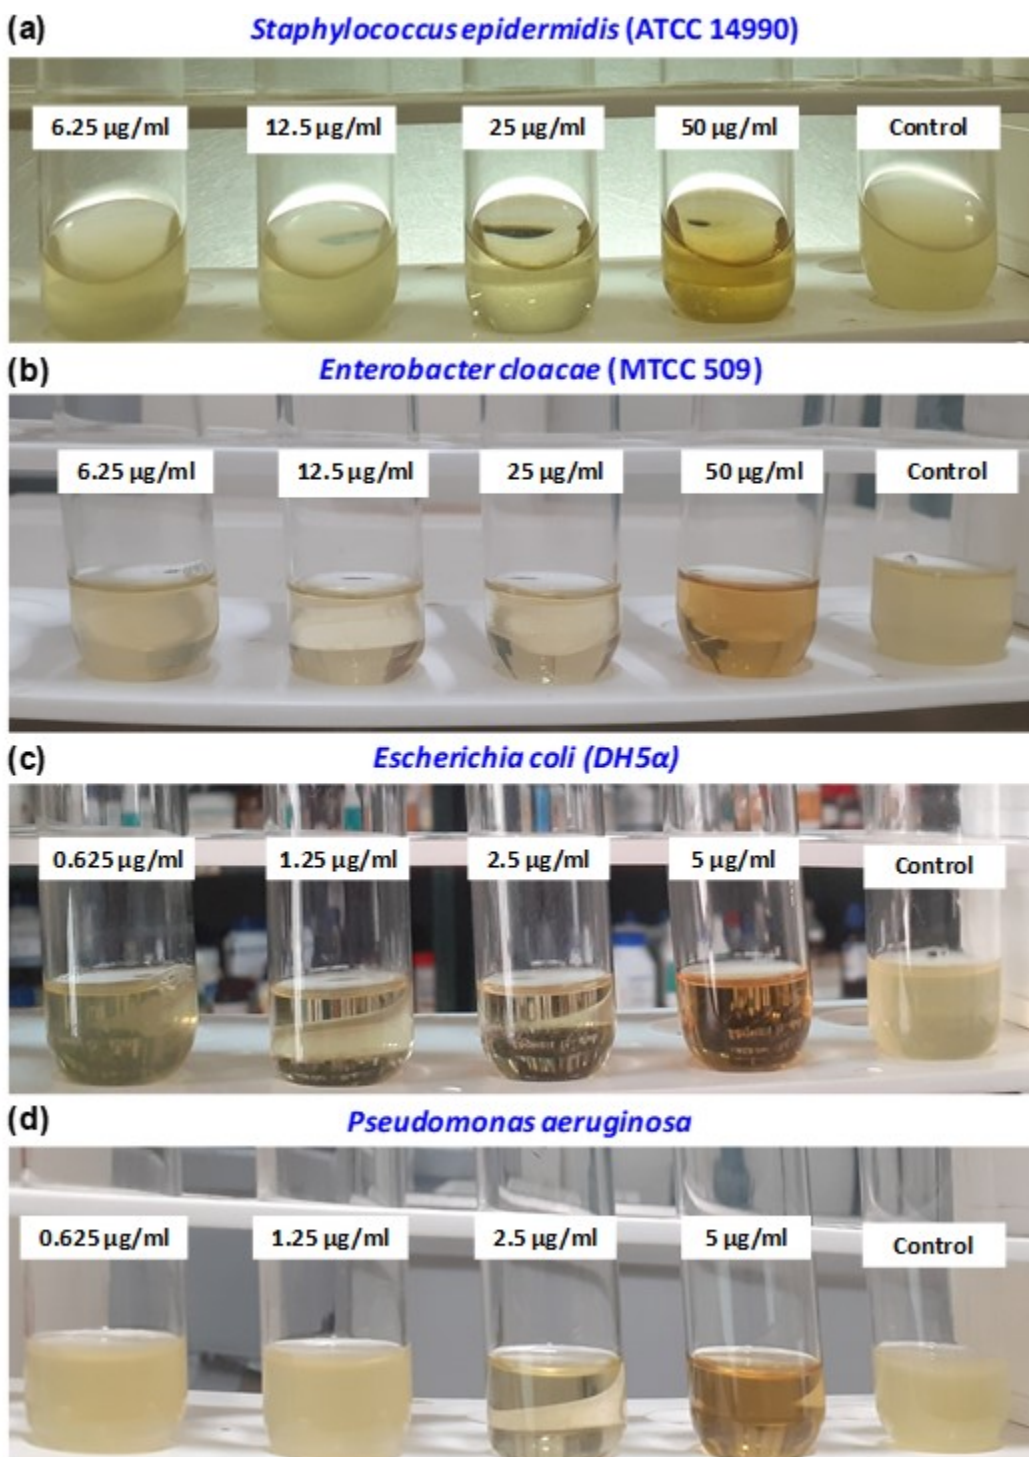

**Fig. S1.** Determination of MIC of CDs in pathogenic bacteria. Images show a continuous decrease in  $OD_{600nm}$  with increase in CD concentration in (a) *Staphylococcus epidermidis* (ATCC 14990), *Enterobacter cloacae* (MTCC 509), *Escherichia coli* DH5 $\alpha$  and *Pseudomonas aeruginosa*. The minimum concentration of CDs at which no bacterial growth (clear solution of culture) was observed determined the MIC.

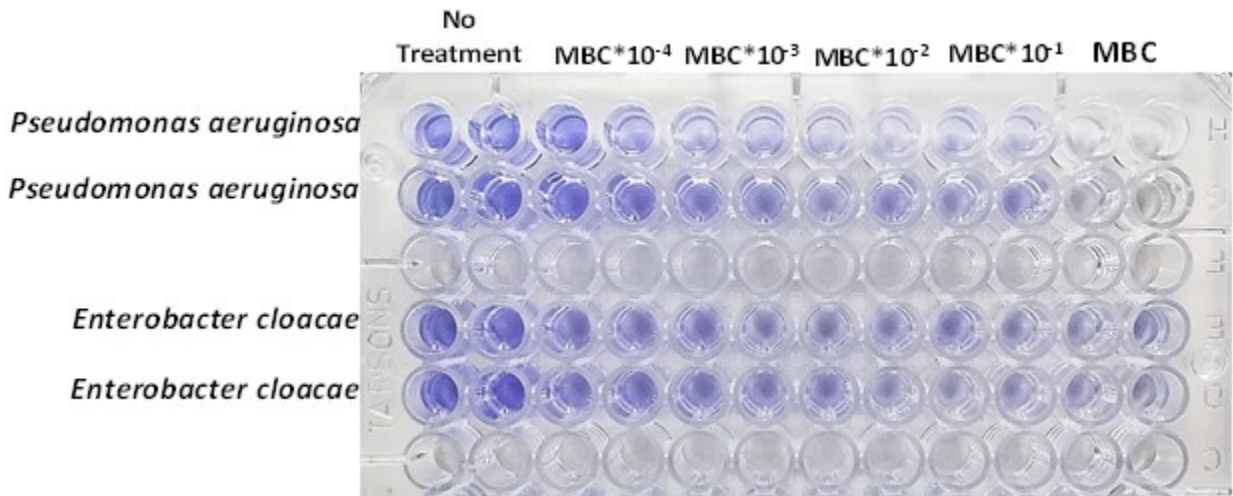

**Fig. S2.** Absorbance-based biofilm inhibition assay in *P. aeruginosa* and *E. cloacae*. Image of a 96-well flat bottom microtiter plate shows a decrease in crystal violet color intensity compared to the untreated sample, indicating biofilm inhibition, in the wells containing CD treatment at the doses of MBC and its ten-fold serial dilution.

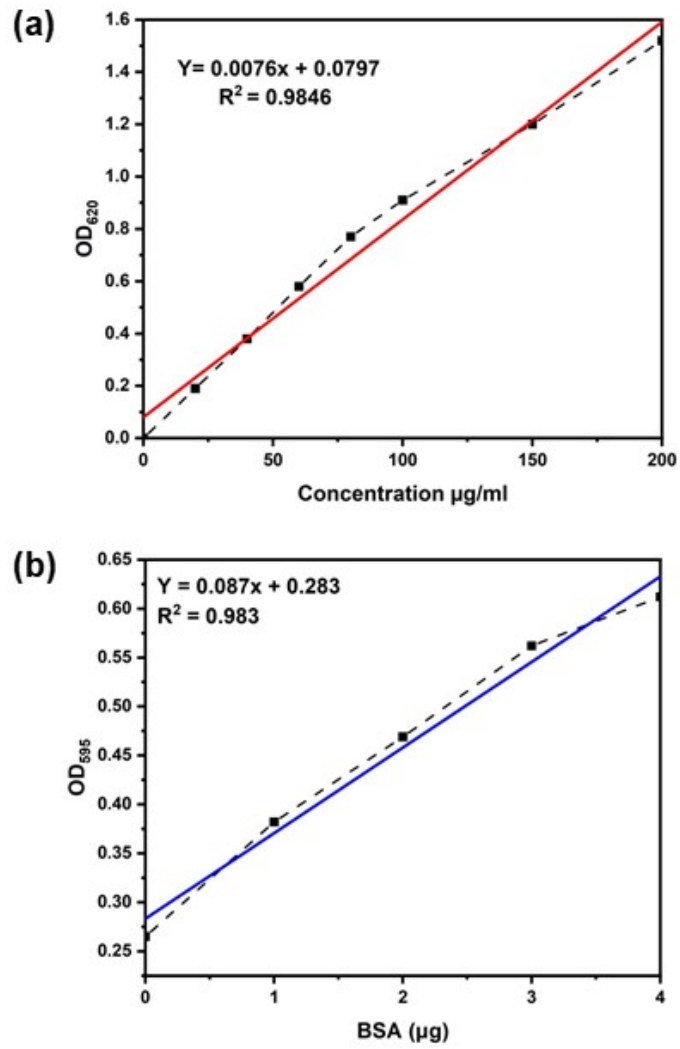

**Fig. S3.** (a) Glucose standard curve for carbohydrate content estimation. (b) Protein (BSA) standard curve for protein estimation
